# Supplementary material
Source: publisher site journal article supplement (https://www.dovepress.com/get_supplementary_file.php?f=351714.docx)
Supplement: Supplementary file 1 [file get_supplementary_file.php]

**Supplementary Information**

# Study title -

# A qualitative study of older adults’ experiences of embedding physical activity within their home care services in Ireland

Pre-amble. Thank you for agreeing to take part in this interview to give us feedback on CTM. Confirm that consent to record interview and opportunity to review. Turn on dictaphone and confirm start. Note start time.

**Themes to be explored /open questions**

1. Tell me about your **experience** with Care to Move?
2. Is there anything in your everyday life that you can do now that you had not been able to do prior to CTM ? *Have you noticed any* ***changes****? What are they?*
3. What part of CTM was the **most valuable**? *And why?*
4. What did you **like** about CTM? *And why?*
5. Was there anything you did **not like** about CTM? *And why?*
6. Was CTM **easy or hard for you to do**? *What was this? Why?*
7. Did you **need help** to do CTM? *Who helped you? How did they (carer/family) help you?*
8. Is there anything you would **change** about CTM, ***what? why?***
9. Having completed CTM, what are **your views on it**, What are the **benefits**?
10. What was your experience of being in the CTM **research study**?
11. Is there **anything else you** would like to mention about CTM / the study?

Thank you, Turn off Dictaphone. Note finish time
